# Supplementary material for: The IL-1 Antagonist Anakinra Attenuates Glioblastoma Aggressiveness by Dampening Tumor-Associated Inflammation
Source: Cancers (Basel). 2020 Feb 13;12(2):433. doi: 10.3390/cancers12020433 (PMC7072290; doi:10.3390/cancers12020433)
Supplement: Supplementary file 1 [file cancers-12-00433-s001.zip]

Archive with 10 entries (10 files):
- Suppl_Fig_1.pdf
- __MACOSX/._Suppl_Fig_1.pdf
- Suppl_Fig_2.pdf
- __MACOSX/._Suppl_Fig_2.pdf
- Suppl_Fig_3.pdf
- __MACOSX/._Suppl_Fig_3.pdf
- Suppl. Table 1.pdf
- __MACOSX/._Suppl. Table 1.pdf
- Suppl. Table 2.pdf
- __MACOSX/._Suppl. Table 2.pdf
