# Supplementary material for: The IL-1 Antagonist Anakinra Attenuates Glioblastoma Aggressiveness by Dampening Tumor-Associated Inflammation
Source: Cancers (Basel). 2020 Feb 13;12(2):433. doi: 10.3390/cancers12020433 (PMC7072290; doi:10.3390/cancers12020433)
Supplement: Supplementary file 1 [file cancers-12-00433-s001.zip › Suppl. Table 1.pdf]

**Table S1.** qRT-PCR primer sequences and assay characteristics

| Target       | UPL probe number | Primer sequence                                                                          |
|--------------|------------------|------------------------------------------------------------------------------------------|
| TBP          | 87               | forward: 5'-GAACATCATGGATCAGAACACA-3'<br>reverse: 5'-ATAGGGATTCCGGGAGTCAT-3'             |
| SDHA         | 132              | forward: 5'-GAGGCAGGGTTTAATACAGCA-3'<br>reverse: 5'-CCAGTTGTCCTCCTCCATGT-3'              |
| IL-1 $\beta$ | 41               | forward: 5'-GAGGCACAAGGCACAACAG-3'<br>reverse: 5'-CCATGGCTGCTTCAGACAC-3'                 |
| CCL2         | 40               | forward: 5'-AGTCTCTGCCGCCCTTCT-3'<br>reverse: 5'-GTGACTGGGGCATTGATTG-3'                  |
| COX-2        | 2                | forward: 5'-GCTTTATGCTGAAGCCCTATGA-3'<br>reverse: 5'-TCCAACCTCTGCAGACATTTCC-3'           |
| BCL-2        | 6                | forward: 5'-ACAGAGGATCATGCTGTACTTAAAAA-3'<br>reverse: 5'-TTATTTTCATGAGGCACGTTATTATTAG-3' |
| STAT3        | 4                | forward: 5'-GGCCATCTTGAGCACTAAGC-3'<br>reverse: 5'-CGGACTGGATCTGGGTCTTA-3'               |
| IL-22        | 6                | forward: 5'-CAACAGGCTAAGCACATGTCA-3'<br>reverse: 5'-ACTGTGTCCTTCAGCTTTTGC-3'             |
| IL-17        | 8                | forward: 5'-TGGGAAGACCTCATTGGTGT-3'<br>reverse: 5'-GGATTTTCGTGGGATTGTGAT-3'              |
| IFN $\gamma$ | 21               | forward: 5'-GGCATTTTGAAGAATTGGAAAG-3'<br>reverse: 5'-TTTGGATGCTCTGGTCATCTT-3'            |
| IL-10        | 67               | forward: 5'-TGCCTTCAGCAGAGTGAAGA-3'<br>reverse: 5'-GCAACCCAGGTAACCCTTAAA-3'              |
| GZMB         | 37               | forward: 5'-GGGGGACCCAGAGATTAAAA-3'<br>reverse: 5'-CCATTGTTTCGTCCATAGGAG-3'              |
| PRF1         | 26               | forward: 5'-CACTCACAGGCAGCCAACT-3'<br>reverse: 5'-GGGAGTGTGTACCACATGGA-3'                |
| BAX          | 69               | forward: 5'-CATCATGGGCTGGACATTG-3'<br>reverse: 5'-GGGACATCAGTCGCTTCAGT-3'                |
| IL-8         |                  | Roche RealTime Ready Single Assay ID 103136                                              |
