# Supplementary material for: The IL-1 Antagonist Anakinra Attenuates Glioblastoma Aggressiveness by Dampening Tumor-Associated Inflammation
Source: Cancers (Basel). 2020 Feb 13;12(2):433. doi: 10.3390/cancers12020433 (PMC7072290; doi:10.3390/cancers12020433)
Supplement: Supplementary file 1 [file cancers-12-00433-s001.zip › Suppl. Table 2.pdf]

**Table S2.** Patient characteristics

| <b>patient</b> | <b>MGMT-status</b>   | <b>IDH-status</b> | <b>age [years]</b> | <b>gender</b> |
|----------------|----------------------|-------------------|--------------------|---------------|
| 1              | unmethylated         | wild-type         | 66                 | male          |
| 2              | methylated           | wild-type         | 65                 | male          |
| 3              | partially methylated | wild-type         | 77                 | female        |
| 4              | methylated           | wild-type         | 51                 | female        |
| 5              | unmethylated         | wild-type         | 57                 | female        |
| 6              | unmethylated         | wild-type         | 55                 | male          |
